# Supplementary material for: Monolayer SnI2: An Excellent p-Type Thermoelectric Material with Ultralow Lattice Thermal Conductivity
Source: MDPI journal article supplement (doi:10.3390/ma15093147), 2022-04-26
Supplement: s1 [file s1]

# Supporting Information

Monolayer SnI<sub>2</sub>: an excellent p-type thermoelectric material with ultralow lattice thermal conductivity

Qing-Yu Xie<sup>a, b</sup>, Jiang-Jiang Ma<sup>a, c</sup>, Peng-Fei Liu<sup>a, c</sup>, Fang-Guang Kuang<sup>d</sup>, Kai-wang Zhang<sup>\*a</sup> and Bao-Tian Wang<sup>\*a, c, e</sup>

<sup>a</sup> Institute of High Energy Physics, Chinese Academy of Science (CAS), Beijing 100049, China. E-mail: [wangbt@ihep.cn](mailto:wangbt@ihep.cn)

<sup>b</sup> School of Physics and Optoelectronics, Xiangtan University, Hunan 411105, China. E-mail: [kw@xtu.edu.cn](mailto:kw@xtu.edu.cn)

<sup>c</sup> Spallation Neutron Source Science Center (SNS), Dongguan 523803, China

<sup>d</sup> School of Physics and Electronic Information, Gannan Normal University, Ganzhou 341000, China

<sup>e</sup> Collaborative Innovation Center of Extreme Optics, Shanxi University, Taiyuan 030006, China

E-mail: [wangbt@ihep.cn](mailto:wangbt@ihep.cn)

## The Thermal Stability

The thermodynamic stability of the 2D system is of great importance. We run the ab-initio molecular dynamics (AIMD) simulations at 800 K for SnI<sub>2</sub> monolayers. Results show that SnI<sub>2</sub> monolayer can be maintained up to 10 ps at 800 K, suggesting they are stable at high temperature.

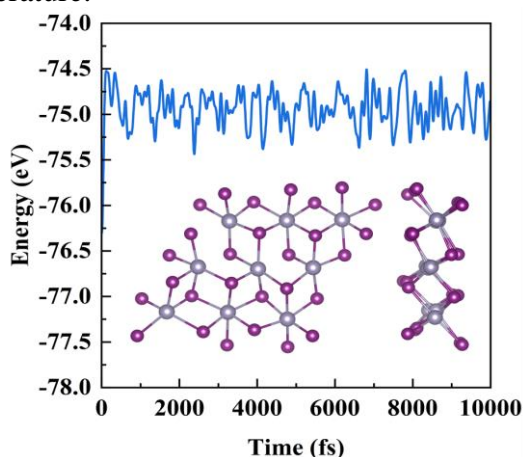

**Figure S1.** Free energy fluctuations with respect to time and equilibrium structures of SnI<sub>2</sub> monolayer by AIMD simulations at 800 K.
